# Supplementary material for: Galunisertib-Loaded Gelatin Methacryloyl Hydrogel Microneedle Patch for Cardiac Repair after Myocardial Infarction
Source: PubMed Central journal article supplement — ACS Appl Mater Interfaces. 2022 Aug 29;14(36):40491–500. doi: 10.1021/acsami.2c05352 (PMC9478946; doi:10.1021/acsami.2c05352), 2022-08-29
Supplement: am2c05352_si_001.pdf [file am2c05352_si_001.pdf]

## Supporting Information

### Galunisertib-Loaded Gelatin Methacryloyl Hydrogel Microneedle Patch for Cardiac Repair after Myocardial Infarction

HaitingChen,<sup>†,¶</sup> LuFan,<sup>⊥,¶</sup> NingxinPeng,<sup>‡,¶</sup> YongYin,<sup>†</sup> DanMu,<sup>#</sup> JunWang,<sup>\*,¶</sup>  
RanMeng,<sup>\*,§</sup> JunXie,<sup>\*,†,‡</sup>

<sup>†</sup>Department of Cardiology, Nanjing Drum Tower Hospital, the Affiliated Hospital of Nanjing University Medical School, Nanjing University, No. 321 Zhongshan Road, Nanjing 210008, China

<sup>‡</sup>Department of Cardiology, Nanjing Drum Tower Hospital, Clinical College of Nanjing Medical University, No. 321 Zhongshan Road, Nanjing 210008, China

<sup>§</sup>Department of Endocrinology, Nanjing Drum Tower Hospital, The Affiliated Hospital of Nanjing University Medical School, Nanjing University, No. 321 Zhongshan Road, Nanjing 210008, China

<sup>¶</sup>Department of Emergency, Nanjing Drum Tower Hospital, The Affiliated Hospital of Nanjing University Medical School, Nanjing University, No. 321 Zhongshan Road, Nanjing 210008, China

<sup>⊥</sup>State Key Laboratory of Bioelectronics, School of Biological Science and Medical Engineering, Southeast University, No. 2, Sipailou, Nanjing 210096, China

<sup>#</sup>Department of Radiology, Nanjing Drum Tower Hospital, The Affiliated Hospital of Nanjing University Medical School, Nanjing University, No. 321 Zhongshan Road, Nanjing 210008, China

\*Email: wjgaogou@aliyun.com. Phone/Fax: 86-25-68182812.

\*Email: mengran-apple@hotmail.com. Phone/Fax: 86-25-68182812.

\*Email: xiejun@nju.edu.com. Phone/Fax: 86-25-68182812

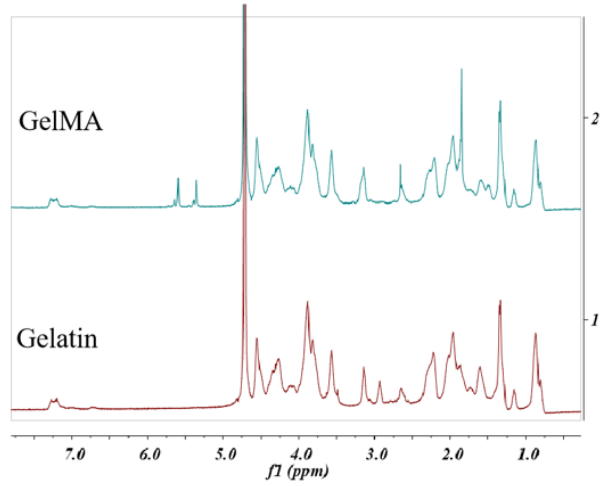

**Figure S1. The  $^1\text{H}$  NMR spectra of GelMA and Gelatin.** Gelatin and synthesized GelMA were dissolved in  $\text{D}_2\text{O}$  and the structure was analyzed by proton nuclear magnetic resonance ( $^1\text{H}$ -NMR).

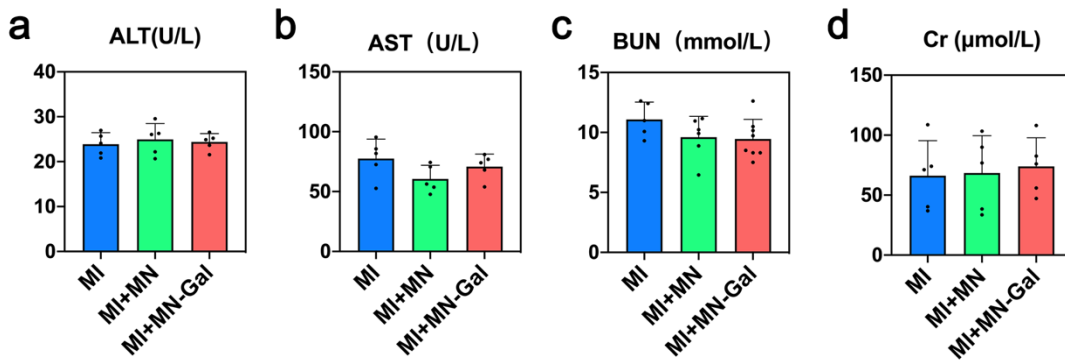

**Figure S2. The effect of MN-Gal patch on liver and kidney function.** (a) Serum ALT, (b) AST, (c) SCr, and (d) BUN, which revealed the rats' hepatic and renal function, were evaluated at the endpoint (28 days after MI).  $n \geq 5$  animals per group. All data were presented as Means  $\pm$  SD. Comparisons between three groups were performed using one-way ANOVA, followed by Tukey's multiple comparisons test.

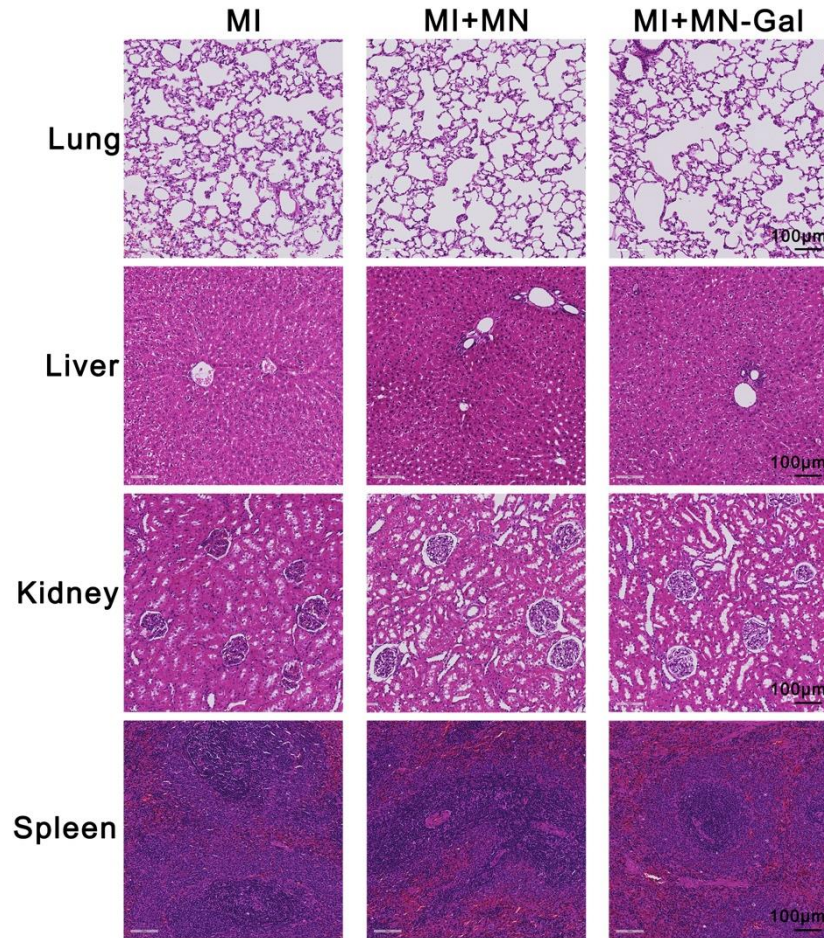

**Figure S3. The effect of MN-Gal patch on other organs besides the heart.** Representative H&E staining images of lung, liver, kidney and spleen tissue. Scar bar: 100µm.

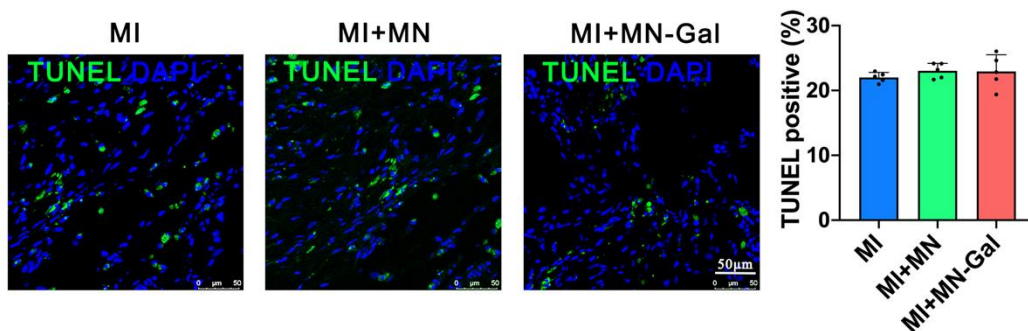

**Figure S4. The effect of MN-Gal patch on cardiac apoptosis.** Representative fluorescent micrographs showing the presence of TUNEL<sup>+</sup> apoptotic cells (green) in the MI hearts at the endpoint (scale bar: 50µm.). Quantify the TUNEL<sup>+</sup> cells to total cells ratio. n≥5 animals per group. All data were presented as Means ± SD. Comparisons between three groups were performed using one-way ANOVA, followed by Tukey's multiple comparisons test.
